# Supplementary material for: Adsorption behavior and removal mechanism of arsenic on graphene modified by iron–manganese binary oxide (FeMnOx/RGO) from aqueous solutions
Source: Royal Society of Chemistry journal article supplement (doi:10.1039/c5ra11601e), 2015-01-01

## Supplementary Information

**Table S1.** BET surface area, total pore volume and mean pore diameter of RGO, FeMnO<sub>x</sub> and FeMnO<sub>x</sub>/RGO.

| <i>Adsorbent</i>        | <i>Mass ratios of FeMnO<sub>x</sub></i> | <i>Surface area (<math>S_{BET}</math> (<math>m^2 g^{-1}</math>))</i> | <i>Total pore volume <math>V_p</math> (<math>cm^3 g^{-1}</math>)</i> | <i>Mean pore diameter (nm)</i> |
|-------------------------|-----------------------------------------|----------------------------------------------------------------------|----------------------------------------------------------------------|--------------------------------|
| RGO                     | 0%                                      | 548                                                                  | 0.54                                                                 | 5.83                           |
| FeMnO <sub>x</sub>      | 100%                                    | 360                                                                  | 0.45                                                                 | 4.97                           |
| FeMnO <sub>x</sub> /RGO | 14%                                     | 452                                                                  | -                                                                    | -                              |
| FeMnO <sub>x</sub> /RGO | 45%                                     | 411                                                                  | 0.59                                                                 | 5.62                           |
| FeMnO <sub>x</sub> /RGO | 76.5%                                   | 380                                                                  | -                                                                    | -                              |

**Table S2.** pH values of arsenic solution before and after arsenic removal onto FeMnO<sub>x</sub>/RGO.

|                   |               |             |             |             |             |              |
|-------------------|---------------|-------------|-------------|-------------|-------------|--------------|
| <i>As(III) pH</i> | <i>before</i> | <i>3.10</i> | <i>5.10</i> | <i>6.91</i> | <i>8.92</i> | <i>10.91</i> |
|                   | <i>after</i>  | <i>4.00</i> | <i>6.69</i> | <i>7.08</i> | <i>7.25</i> | <i>9.40</i>  |
| <i>As(V) pH</i>   | <i>before</i> | <i>3.10</i> | <i>4.94</i> | <i>7.17</i> | <i>8.94</i> | <i>11.06</i> |
|                   | <i>after</i>  | <i>4.08</i> | <i>6.54</i> | <i>7.23</i> | <i>7.40</i> | <i>10.10</i> |

**Table S3.** Langmuir isotherm parameters for As (III) and As(V) adsorption by FeO<sub>x</sub>/RGO and MnO<sub>x</sub>/RGO.

| <i>Adsorbent</i>      | <i>Arsenic</i> | <i>Langmuir model</i> |                       |                |
|-----------------------|----------------|-----------------------|-----------------------|----------------|
|                       |                | b(L/mg)               | q <sub>m</sub> (mg/g) | R <sup>2</sup> |
| FeO <sub>x</sub> /RGO | As(III)        | 1.44                  | 5.96                  | 0.9491         |
|                       | As(V)          | 1.09                  | 12.14                 | 0.9320         |
| MnO <sub>x</sub> /RGO | As(III)        | 1.87                  | 2.95                  | 0.9874         |
|                       | As(V)          | 1.84                  | 3.41                  | 0.9936         |

**Figure S1.** Nitrogen adsorption and desorption isotherms of FeMnO<sub>x</sub>.

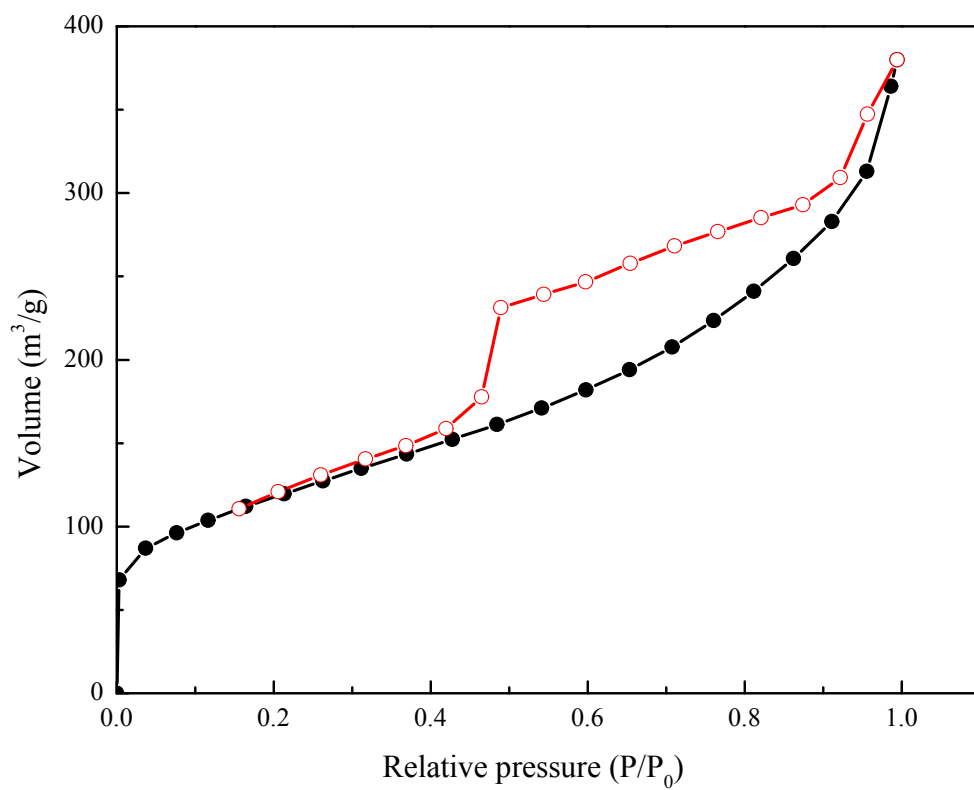

**Figure S2.** XRD patterns of (a) RGO, (b) FeMnO<sub>x</sub> and (c) FeMnO<sub>x</sub>/RGO.

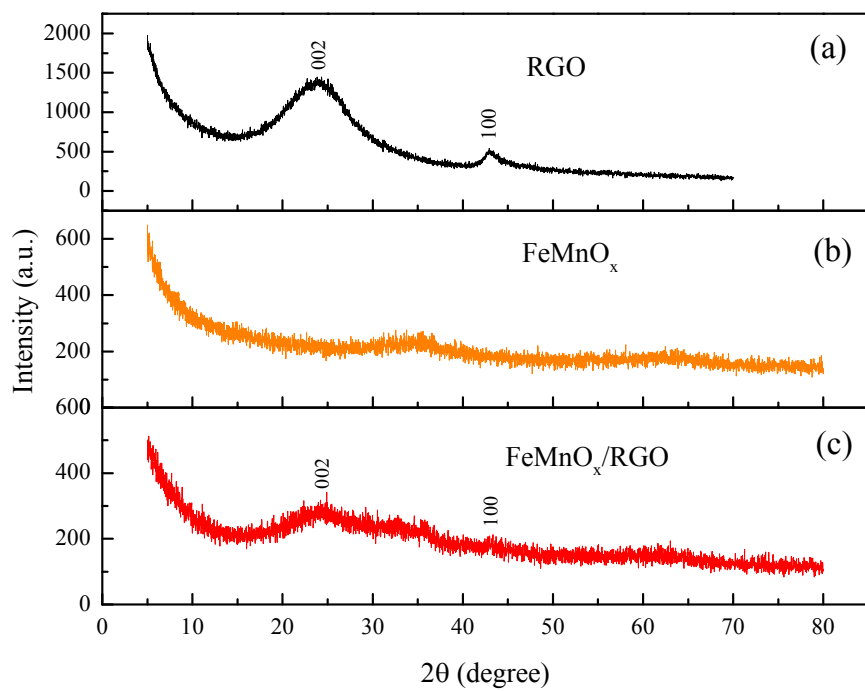

**Figure S3.** FTIR spectrums of RGO, FeMnO<sub>x</sub> and FeMnO<sub>x</sub>/RGO in the range of wavenumber from 400 to 1900 cm<sup>-1</sup>.

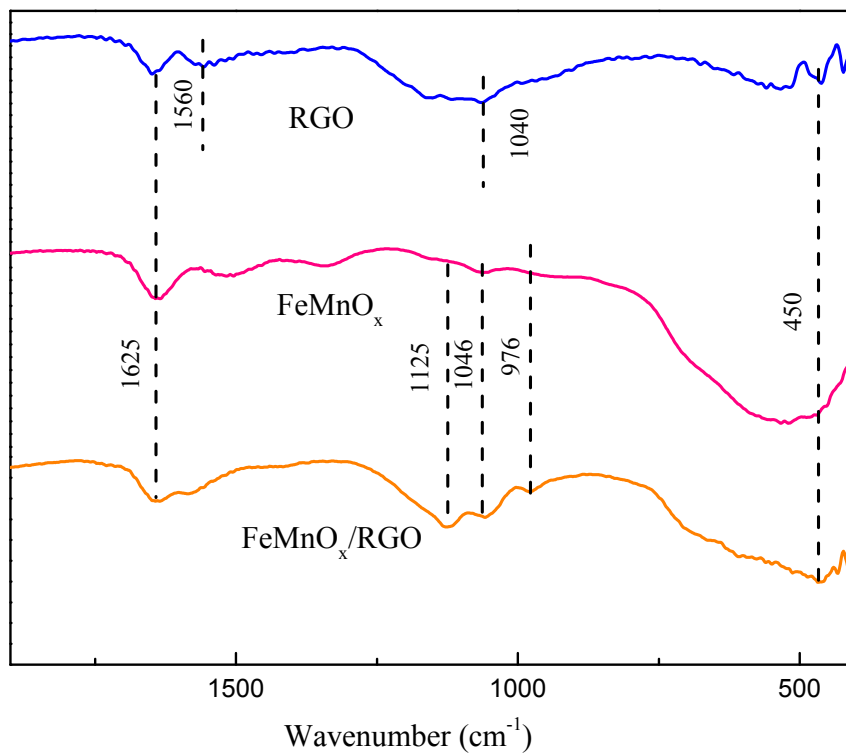

**Figure S4.**  $\text{pH}_{\text{PZC}}$  values of (a) RGO, (b)  $\text{FeMnO}_x$  and (c)  $\text{FeMnO}_x/\text{RGO}$ .

(a)

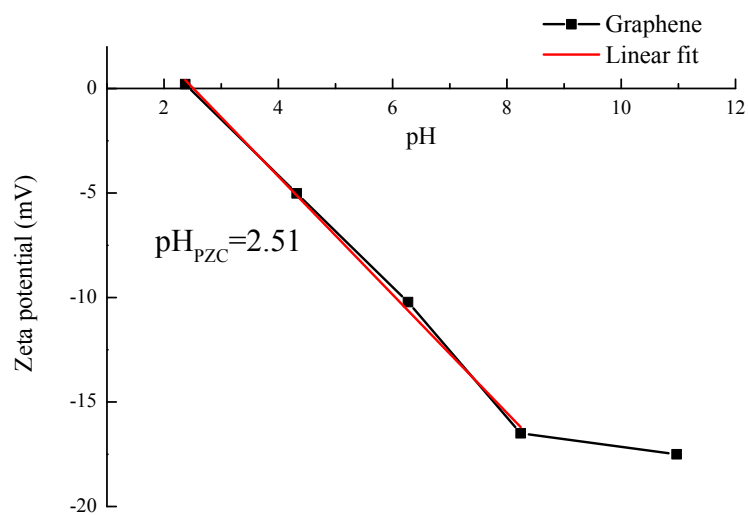

(b)

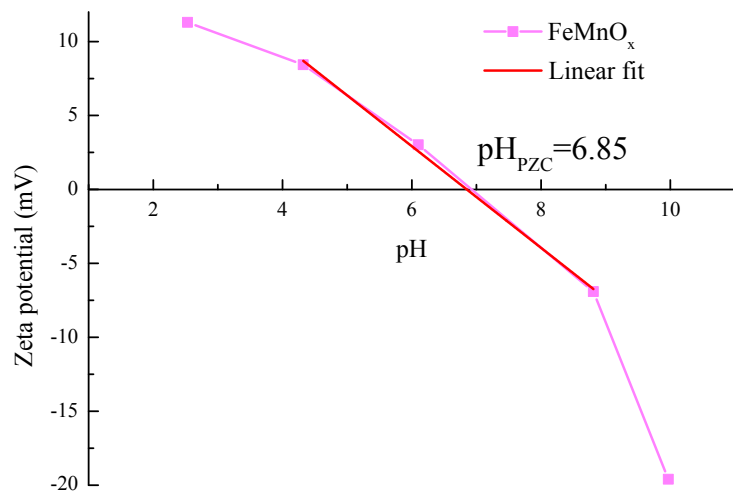

(c)

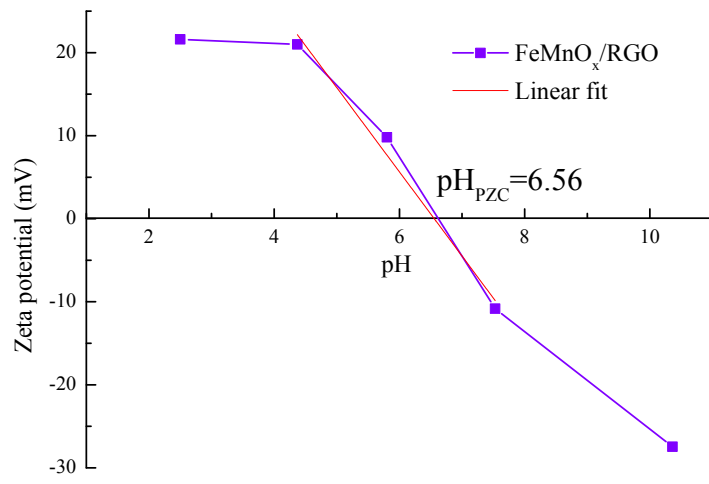

Supplement: c5ra11601e1.pdf [file c5ra11601e1.pdf]
